# Supplementary material for: Polarization of the epithelial layer and apical localization of integrins are required for engulfment of apoptotic cells
Source: Oxford University Press journal article supplement (doi:10.1242/dmm.021998), 2015-01-01
Supplement: dmm021998supp.pdf [file dmm021998supp.pdf]

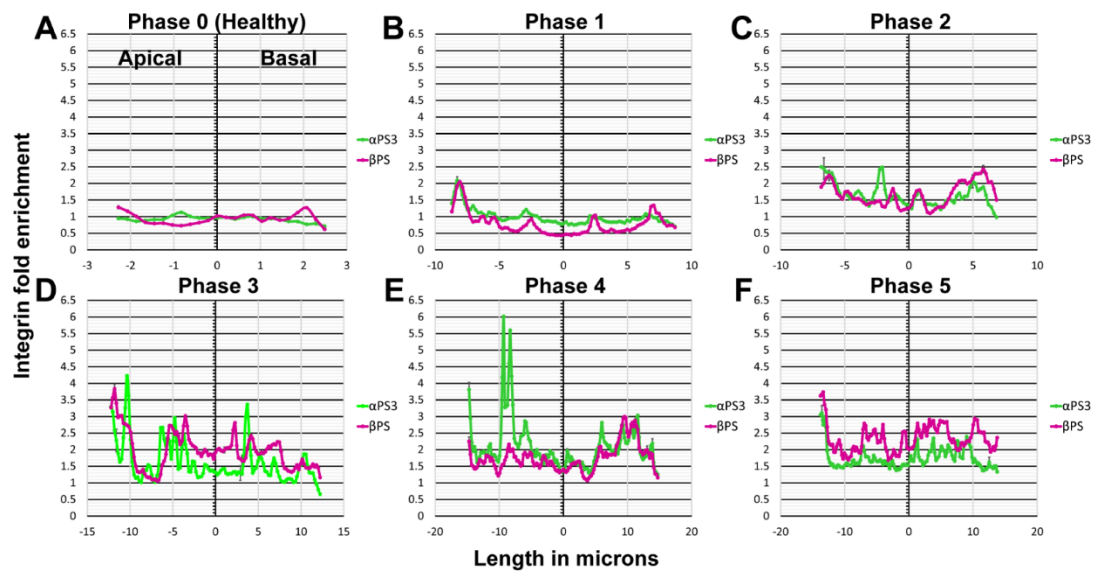

Figure S1. **Quantification approach for integrin enrichment.** (A-F) Representative line plots taken from single cells from healthy and progressively dying wild-type egg chambers used to quantify the average amount of  $\alpha$ PS3 and  $\beta$ PS in apical and basal regions, and in the cytoplasm. The length of the cell in microns is on the x-axis and integrin fold enrichment is on the y-axis.

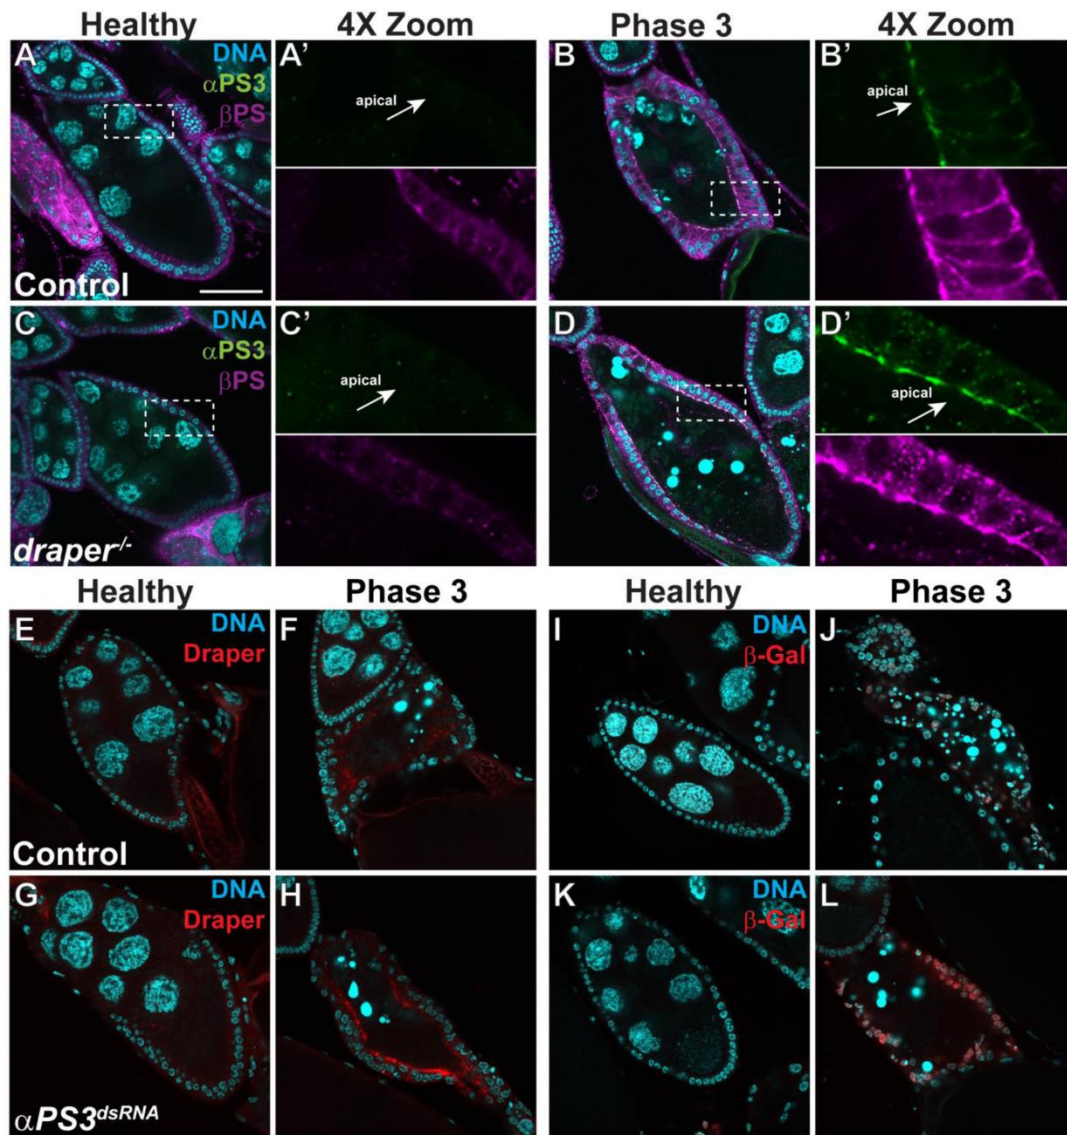

Figure S2. **Integrin knockdown egg chambers are not defective for the Draper/JNK pathway.** (A-D) Egg chambers from starved flies stained with DAPI (cyan), anti-αPS3 (green), and anti-βPS (magenta). Scale bar is 50 μm. (A-B') Wild-type (*w<sup>1118</sup>*) egg chambers show normal integrin enrichment on the follicle cells during engulment. (C-D') *draper<sup>-/-</sup>* egg chambers show normal integrin enrichment, but defective engulment. (E-H) Egg chambers from starved flies stained with DAPI (cyan) and α-Draper (red). (E-F) Sibling control egg chambers show Draper enrichment on the follicle cells during engulment. (G-H) Egg chambers expressing αPS3<sup>dsRNA</sup> have normal enrichment of Draper on the follicle cells. (I-L) Egg chambers from starved flies carrying a *lacZ* enhancer trap in *puckered* stained with DAPI (cyan) and anti-β-Gal. (I-J) *GR1GAL4 puclacZ/TM3* egg chambers show an increase in *puclacZ* expression during engulment. (K-L) Egg chambers expressing αPS3<sup>dsRNA</sup> show an increase in *puclacZ* expression during engulment. Scale bar is 50 μm.

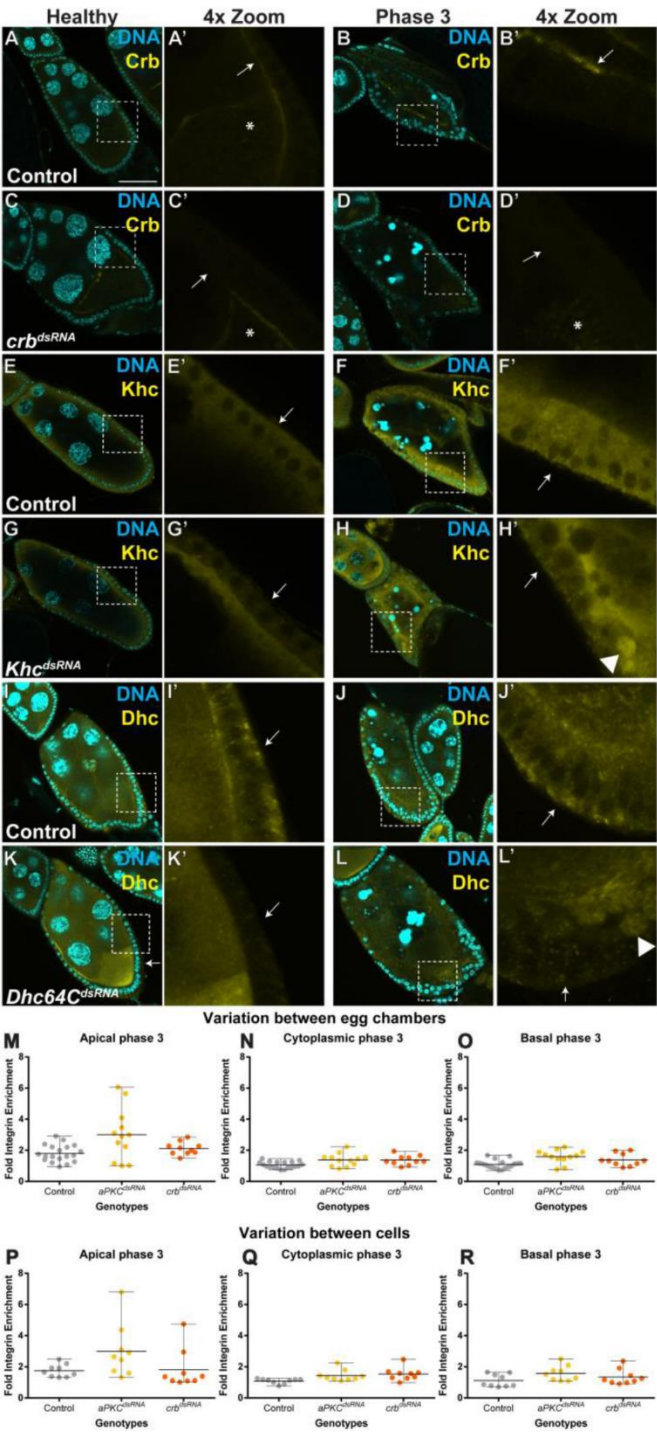

**Figure S3. dsRNA effectively knocks down *crb*, *Khc*, and *Dhc64C*.** (A-D') Egg chambers stained with DAPI (cyan) and  $\alpha$ -Crb (yellow). Crb is expressed in the oocyte and apically enriched on the follicle cells. (A-A') Healthy sibling control egg chambers show Crumbs within the oocyte (asterisk) and apically enriched on the follicle cells (arrow). (B-B') Phase 3 sibling control egg chambers only show Crumbs apically enriched on the follicle cells (arrow). (C-D') *crb*<sup>dsRNA</sup> healthy and phase 3 egg chambers only show Crumbs within the oocyte (asterisks). (E-H') Egg chambers stained with DAPI (cyan) and  $\alpha$ -Khc (yellow). Khc is expressed in both the germline and follicle cells. (E-F') Healthy and phase 3 sibling control egg chambers show FC enlargement and Khc localization within the cytoplasm (white arrows) as engulfment progresses. (G-H') *Khc*<sup>dsRNA</sup> healthy and phase 3 egg chambers show a reduced amount of Khc in the FCs but not in the germline (G', H', white arrow), normal FC enlargement and no engulfment defects. A vesicle engulfed by the FCs can be seen clearly due to the lack of Khc in the FC cytoplasm (H', arrowhead). (I-L') Egg chambers stained with DAPI (cyan) and  $\alpha$ -Dhc (yellow). Dhc is expressed in both the germline and follicle cells. (I-J') Sibling control healthy and phase 3 egg chambers show cytoplasmic Dhc localization in the follicle cells (white arrows). (K-L') Egg chambers expressing *Dhc64C*<sup>dsRNA</sup> show minimal Dhc in healthy and phase 3 follicle cells (white arrows), and germline Dhc within vesicles (L', arrowhead). These egg chambers have minimal FC enlargement and defective engulfment. (M-O) Scatter plots showing the variability of integrin enrichment, between phase 3 egg chambers, on the apical surface, within the cytoplasm, and on the basal surface, for control, *aPKC*<sup>dsRNA</sup>, and *crb*<sup>dsRNA</sup> egg chambers. N (number of egg chambers) for eGFP<sup>dsRNA</sup> (control) is 19, for *aPKC*<sup>dsRNA</sup> is 12, and for *crb*<sup>dsRNA</sup> is 10. (P-R) Scatter plots showing the variability of integrin enrichment between cells within a representative phase 3 egg chamber, for control, *aPKC*<sup>dsRNA</sup>, and *crb*<sup>dsRNA</sup> egg chambers. Scale bar is 50  $\mu$ m.



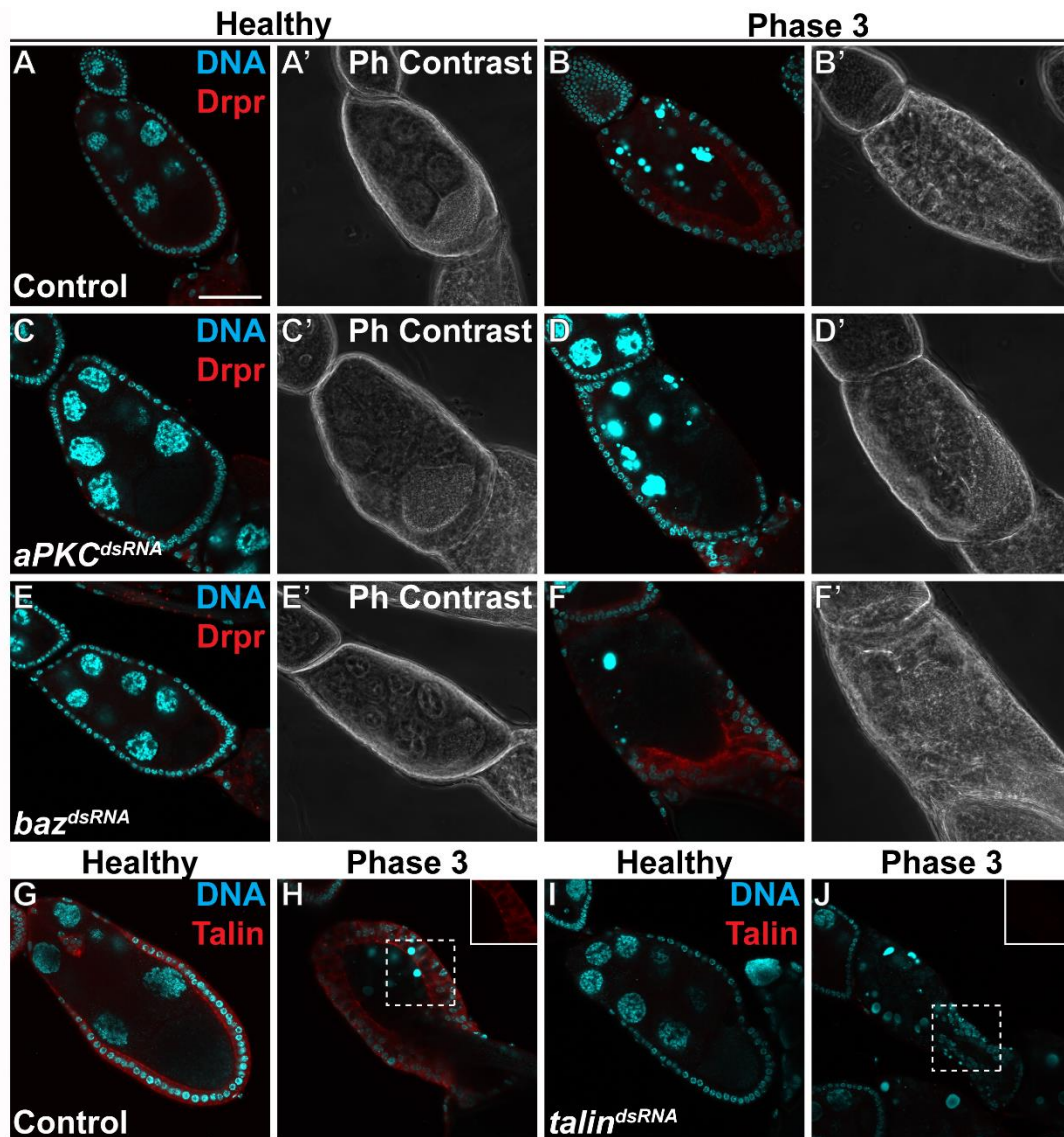

Figure S4. **Draper localization is defective in egg chambers expressing  $aPKC^{dsRNA}$  and dsRNA effectively knocks down talin.** (A-F') Egg chambers from starved flies stained with DAPI (cyan) and  $\alpha$ -Drpr (red), phase contrast shown in gray to identify follicle cell membranes. (A-B') Control ( $Gal80/+$ ;  $GRI-G89/UAS-eGFP^{dsRNA}$ ) healthy and phase 3 dying egg chambers show an apical enrichment of the engulfment receptor Draper as engulfment progresses. (C-D')  $aPKC^{dsRNA}$  healthy and mid dying egg chambers show a reduced apical localization of Draper. (E-F')  $baz^{dsRNA}$  healthy and dying egg chambers show no apparent defects in Draper localization. Similar Draper expression was seen in all the other knockdown lines. (G-J) Egg chambers from starved flies stained with DAPI (cyan) and  $\alpha$ -Talin (red). (G-H) Sibling control egg chambers show Talin on the follicle cells in a healthy and dying egg chamber. (I-J) Egg chambers expressing  $talin^{dsRNA}$  have no detectable Talin on the FCs in a healthy or dying egg chamber. Scale bar is 50  $\mu$ m.

Table S1: Candidate dsRNA Screen Results

|               | Bloomington or Vienna number | Allele   | Gene                                   | Germline engulfment defects | Other defects                      |
|---------------|------------------------------|----------|----------------------------------------|-----------------------------|------------------------------------|
| Transmembrane | 27545                        | JF02696  | <i>scb</i> <sup>#</sup>                | ***                         | -                                  |
|               | 33642                        | HMS00043 | <i>mys</i> <sup>#</sup>                | ***                         | -                                  |
|               | 37520                        | HMS01662 | <i>pvr</i>                             | *                           | n.d.                               |
|               | 38959                        | HMS01873 | <i>scb</i>                             | **                          | -                                  |
|               | v37172                       | GD20017  | <i>αPS4</i>                            | *                           | -                                  |
|               | 27697                        | JF02777  | <i>crb</i> <sup>#</sup>                | ***                         | -                                  |
|               | 34999                        | HSM01409 | <i>crb</i>                             | *                           | -                                  |
|               | 38373                        | HMS01842 | <i>crb</i>                             | *                           | -                                  |
|               | 33616                        | HMS00009 | <i>Notch</i>                           | ***                         | -                                  |
|               | 33611                        | HMS00001 | <i>Notch</i>                           | ***                         | -                                  |
|               | 28981                        | JF01637  | <i>Notch</i>                           | ***                         | -                                  |
|               | 29306                        | JF02446  | <i>Innexin2</i>                        | -                           | Excessive death without starvation |
|               | 27543                        | JF02694  | <i>mew</i>                             | -                           | -                                  |
|               | v44890                       | GD1230   | <i>mew</i>                             | -                           | -                                  |
|               | 27544                        | JF02695  | <i>if</i>                              | -                           | -                                  |
|               | v44885                       | GD1175   | <i>if</i>                              | -                           | Curved pupae                       |
|               | v100770                      | KK108544 | <i>if</i>                              | -                           | -                                  |
|               | 28545                        | HM05031  | <i>αPS4</i>                            | -                           | -                                  |
|               | v6647                        | GD2181   | <i>αPS5</i>                            | -                           | -                                  |
|               | v100120                      | KK103807 | <i>αPS5</i>                            | -                           | -                                  |
|               | v6646                        | GD2181   | <i>αPS5</i>                            | -                           | -                                  |
|               | 27735                        | JF02819  | <i>mys</i>                             | -                           | -                                  |
|               | 28601                        | HM05089  | <i>βv</i>                              | -                           | -                                  |
|               | v40895                       | GD2503   | <i>βv</i>                              | -                           | -                                  |
|               | 31536                        | JF01096  | <i>Steamer duck/PINCH</i> <sup>#</sup> | **                          | -                                  |
|               | 31537                        | JF01097  | <i>Steamer duck/PINCH</i>              | *                           | -                                  |
|               | 28950                        | HM05161  | <i>Talin</i> <sup>#</sup>              | ***                         | -                                  |
|               | 32999                        | HMS00799 | <i>Talin</i>                           | ***                         | -                                  |
|               | 28336                        | JF02971  | <i>Short stop</i> <sup>#</sup>         | **                          | -                                  |
|               | 34669                        | HMS01146 | <i>Clasp</i> <sup>#</sup>              | **                          | -                                  |
|               | 35045                        | HMS01459 | <i>Numb</i>                            | **                          | Small adult size                   |
|               | 29397                        | JF03330  | <i>Syntaxin 5</i> <sup>#</sup>         | ***                         | -                                  |
|               | 27261                        | JF02549  | <i>Arf6</i>                            | *                           | -                                  |
|               | 51417                        | GLC01795 | <i>Arf6</i>                            | *                           | -                                  |

|               |       |          |                             |     |                                    |
|---------------|-------|----------|-----------------------------|-----|------------------------------------|
| Intracellular | 29559 | JF03238  | <i>Wing blister</i>         | *   | -                                  |
|               | 34082 | HMS01093 | <i>Grasp</i>                | *   | -                                  |
|               | 34084 | HMS01098 | <i>Fasciclin 2</i>          | *   | -                                  |
|               | 31070 | JF01520  | <i>RhoGAPP190</i>           | **  | -                                  |
|               | 27530 | JF02681  | <i>Clathrin heavy chain</i> | *   | -                                  |
|               | 35001 | HMS01411 | <i>aPKC<sup>#</sup></i>     | *** | -                                  |
|               | 25946 | JF01966  | <i>aPKC</i>                 | **  | -                                  |
|               | 38245 | HMS01689 | <i>aPKC</i>                 | **  | -                                  |
|               | 35002 | HMS01412 | <i>baz<sup>#</sup></i>      | **  | -                                  |
|               | 31523 | JF01079  | <i>baz</i>                  | **  | -                                  |
|               | 38361 | HMS01829 | <i>par-6<sup>#</sup></i>    | **  | -                                  |
|               | 35000 | HMS01410 | <i>par-6</i>                | *   | -                                  |
|               | 36698 | HMS01587 | <i>Dhc64C<sup>#</sup></i>   | **  | -                                  |
|               | 28749 | JF03177  | <i>Dhc64C</i>               | **  | -                                  |
|               | 32410 | HMS00405 | <i>par-1</i>                | *** | Excessive death without starvation |
|               | 50712 | HMC03114 | <i>Ecdysone Receptor</i>    | *** | -                                  |
|               | 27705 | JF02813  | <i>Arp14D</i>               | *   | -                                  |
|               | 25955 | JF01975  | <i>WASp</i>                 | *** | -                                  |
|               | 31595 | JF01184  | <i>Jra (jun)</i>            | **  | -                                  |
|               | 28587 | HM05075  | <i>dMekk1</i>               | *** | -                                  |
|               | 32464 | HMS00464 | <i>pk92b (DASK1)</i>        | *   | PWOPs                              |
|               | 27484 | JF02634  | <i>fmr1</i>                 | **  | -                                  |
|               | 31305 | JF01252  | <i>armadillo</i>            | *** | -                                  |
|               | 27484 | JF02634  | <i>fmr1</i>                 | *   | -                                  |
|               | 28985 | JF02813  | <i>Rac1</i>                 | *** | Membrane separation                |
|               | 33767 | JF02794  | <i>Dpp</i>                  | *   | Mainly defects at the anterior end |
|               | 28622 | JF03037  | <i>Mig-2-like/mtl</i>       | *   | -                                  |
|               | 33913 | HMS00856 | <i>Talin</i>                | -   | -                                  |
|               | 28990 | JF02918  | <i>Fasciclin 2</i>          | -   | -                                  |
|               | 34742 | HMS01222 | <i>Clathrin heavy chain</i> | -   | -                                  |
|               | 28717 | JF03144  | <i>Pkd1</i>                 | -   | -                                  |
|               | 34332 | HMS01320 | <i>aPKC</i>                 | -   | -                                  |
|               | 35140 | GL00007  | <i>aPKC</i>                 | -   | -                                  |
|               | 31522 | JF01078  | <i>baz</i>                  | -   | -                                  |
|               | 39010 | HMS01928 | <i>par-6</i>                | -   | -                                  |
|               | 28663 | JF03078  | <i>Lis-1</i>                | -   | -                                  |
|               | 35043 | HMS01457 | <i>Lis-1</i>                | -   | -                                  |

|  |       |          |                         |   |   |
|--|-------|----------|-------------------------|---|---|
|  | 35770 | HMS01519 | <i>Khc</i> <sup>#</sup> | - | - |
|  | 25898 | JF01939  | <i>Khc</i>              | - | - |
|  | 42597 | HMS02429 | <i>Klc</i>              | - | - |
|  | 33934 | HMS00883 | <i>Klc</i>              | - | - |

Bloomington and Vienna (v) stock numbers are listed, as well as any associated TRiP number. Highlighted lines had engulfment defects. The phenotypes are based on a 3-star system, where 3 stars (\*\*\*) is the most severe and 1 star (\*) is the least severe, and is usually associated with weak and/or variable lines. Defects in germline engulfment and additional phenotypes (ovary or whole fly) are noted. Gene names with a pound sign next to them (#) are shown in the paper.
